# Supplementary material for: Adhesion receptor ADGRG2/GPR64 is in the GI-tract selectively expressed in mature intestinal tuft cells
Source: PubMed Central journal article supplement (PMC8105302; doi:10.1016/j.molmet.2021.101231), 2021-04-05

Fig. S1.

### Bac GPR64-mCherry

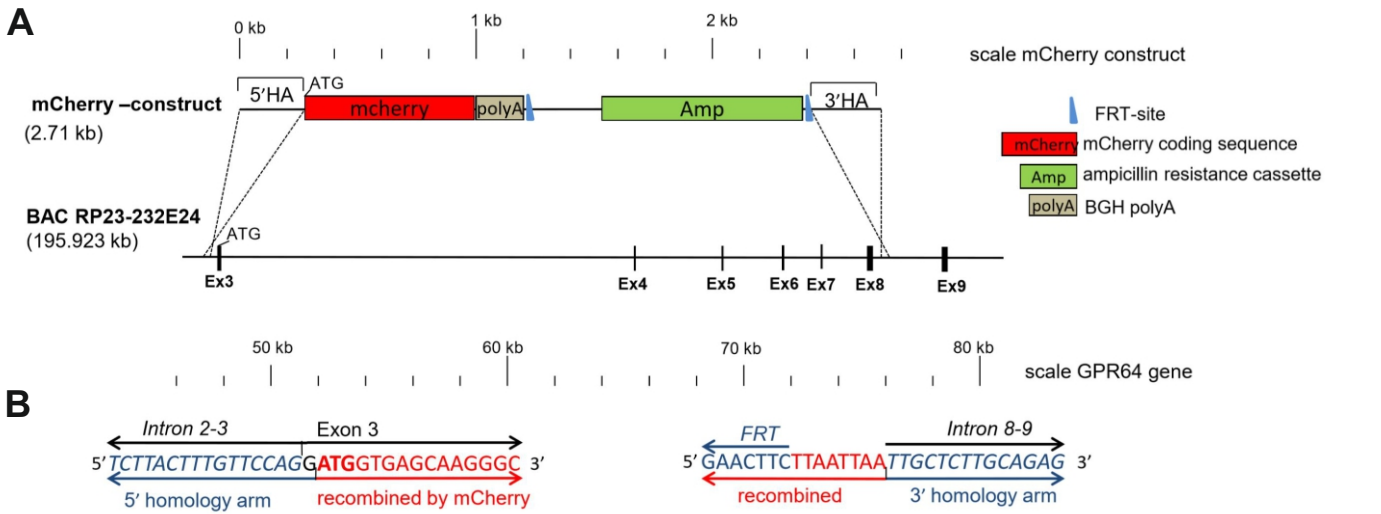

### Bac GPR64-eGFP-DTA

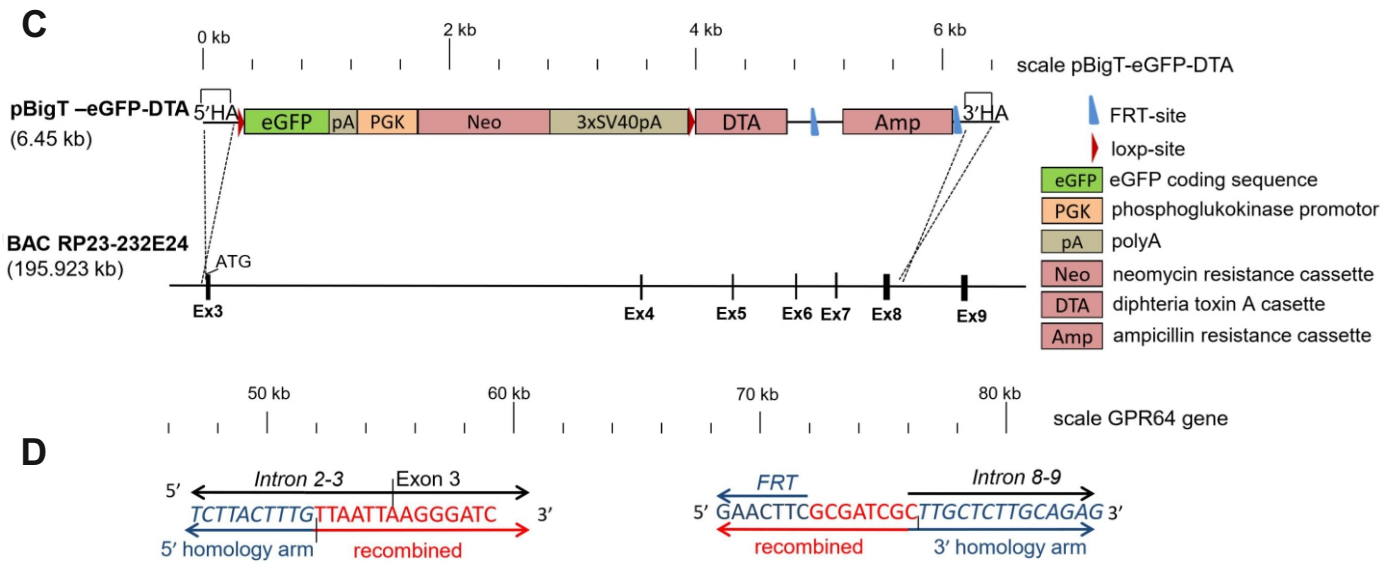

Supplement: mmc1.pdf [file mmc1.pdf]
