# Supplementary material for: Adhesion receptor ADGRG2/GPR64 is in the GI-tract selectively expressed in mature intestinal tuft cells
Source: PubMed Central journal article supplement (PMC8105302; doi:10.1016/j.molmet.2021.101231), 2021-04-05

Fig. S2.

**Circumvallate papillae - taste bud**

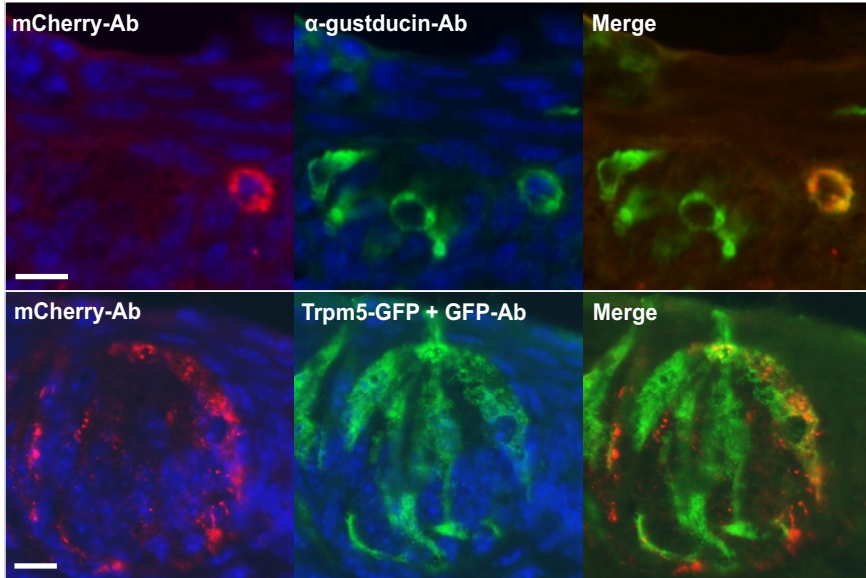

Supplement: mmc2.pdf [file mmc2.pdf]
