# Supplementary material for: Adhesion receptor ADGRG2/GPR64 is in the GI-tract selectively expressed in mature intestinal tuft cells
Source: PubMed Central journal article supplement (PMC8105302; doi:10.1016/j.molmet.2021.101231), 2021-04-05
Supplement: mmc3.pdf [file mmc3.pdf]

**Table S1**

| <b>Peptide/protein target</b>                  | <b>Manufacturer/Provider, Catalog number</b> | <b>Species</b> | <b>Dilution</b> |
|------------------------------------------------|----------------------------------------------|----------------|-----------------|
| Acetylated alpha-tubulin                       | Sigma Aldrich, T7451                         | Mouse          | 1:50 (a.r.)     |
| $\alpha$ -gustducin                            | Santa Cruz, sc-395                           | Rabbit         | 1:100 (a.r.)    |
| Chromogranin A                                 | Immunostar, 20085                            | Rabbit         | 1:400           |
| CCK                                            | In house, 8007                               | Rabbit         | 1:13000         |
| Cytokeration 18 (CK18)                         | Progen, 61028                                | Mouse          | 1:10 (a.r.)     |
| Doublecortin like kinase 1 (DCLK1)             | Abcam, ab37994                               | Rabbit         | 1:50            |
| Doublecortin like kinase 1 (DCLK1)             | Abcam, ab31704                               | Rabbit         | 1:1000          |
| GFP                                            | Abcam, ab6673                                | Goat           | 1:1200          |
| GIP                                            | In house, 80867-4                            | Rabbit         | 1:6000          |
| Hematopoietic Prostaglandin D synthase (HPGDS) | Cayman Chemical, 160013                      | Rabbit         | 1:100 (a.r.)    |
| Secretin                                       | Fahrenkrug, 5585-3                           | Rabbit         | 1:3000          |
| Serotonin                                      | Abcam, ab66047                               | Goat           | 1:3200          |
| Somatostatin                                   | Santa Cruz, sc-7819                          | Goat           | 1:1600          |
| Substance P                                    | In house, 250-2                              | Rabbit         | 1:3200          |
| Protein gene product 9.5 (PGP 9.5)             | Abcam, ab7291                                | Mouse          | 1:4000          |
| Prostaglandin-endoperoxide synthase 1 (PTGS1)  | Santa Cruz, sc-1754                          | Goat           | 1:50 (a.r.)     |
| Prostaglandin-endoperoxide synthase 2 (PTGS2)  | Santa Cruz, sc-1747                          | Goat           | 1:500 (a.r.)    |
| PYY                                            | Acris, EUD5201                               | Guinea pig     | 1:1000          |
| mCherry                                        | Rockland, 600-401-379                        | Rabbit         | 1:400           |
| mCherry                                        | Chromotek, 3F5                               | Mouse          | 1:800           |
|                                                |                                              |                |                 |
| AF 488 anti-mouse IgG                          | Life technologies, A21202                    | Donkey         | 1:200           |
| AF 488 anti-rabbit IgG                         | Life technologies, A21206                    | Donkey         | 1:200           |
| AF 568 anti-mouse IgG                          | Life technologies, A10037                    | Donkey         | 1:200           |
| AF 568 anti-rabbit IgG                         | Life technologies, A10042                    | Donkey         | 1:200           |
| AF 488 anti-goat IgG                           | Life technologies, A10057                    | Donkey         | 1:200           |
| CF488 anti-guinea pig IgG                      | Biotium, 20169                               | Donkey         | 1:200           |

(a.r.): antigen retrieval
