# Supplementary material for: Adhesion receptor ADGRG2/GPR64 is in the GI-tract selectively expressed in mature intestinal tuft cells
Source: PubMed Central journal article supplement (PMC8105302; doi:10.1016/j.molmet.2021.101231), 2021-04-05
Supplement: mmc4.pdf [file mmc4.pdf]

**Table S2**

| <b>Target mRNA</b>                   | <b>Target species</b>           | <b>Manufacturer/<br/>Provider and<br/>cat. no.</b> |
|--------------------------------------|---------------------------------|----------------------------------------------------|
| Peptidylprolyl isomerase B (Ppib)    | Mus musculus                    | 313911                                             |
| Gpr64                                | Mus musculus                    | 430761                                             |
| Gpr91/Sucnr1                         | Mus musculus                    | 446981                                             |
| Glp1r                                | Mus musculus                    | 447051                                             |
| Drd3                                 | Mus musculus                    | 447721                                             |
| Gprc5c                               | Mus musculus                    | 446991                                             |
| Gpr41/Ffar3                          | Mus musculus                    | 447011                                             |
| Dihydrodipicolinate reductase (DapB) | Bacillus subtilis strain<br>SMY | ACD biotechnie,<br>310043                          |
