# Supplementary material for: Adhesion receptor ADGRG2/GPR64 is in the GI-tract selectively expressed in mature intestinal tuft cells
Source: PubMed Central journal article supplement (PMC8105302; doi:10.1016/j.molmet.2021.101231), 2021-04-05
Supplement: mmc5.pdf [file mmc5.pdf]

| signif_rank | LFC_weightedmean | LFC_precision | genesetoverlap | minlogpval  | GO.ID      | GO.term                                                     |
|-------------|------------------|---------------|----------------|-------------|------------|-------------------------------------------------------------|
| 1           | -2,835109585     | 2,107972002   | 427            | 28,89819573 | GO:0007005 | mitochondrion organization                                  |
| 2           | -8,730575066     | 2,603039657   | 255            | 25,93872994 | GO:0042254 | ribosome biogenesis                                         |
| 3           | -7,070284369     | 2,487619425   | 394            | 24,24729125 | GO:0022613 | ribonucleoprotein complex biogenesis                        |
| 4           | -8,739436736     | 2,588412092   | 207            | 22,4845338  | GO:0016072 | rRNA metabolic process                                      |
| 5           | -2,626894406     | 1,927771074   | 254            | 21,53919789 | GO:0009123 | nucleoside monophosphate metabolic process                  |
| 6           | 0,485894438      | 1,946877651   | 451            | 19,9386729  | GO:0051186 | cofactor metabolic process                                  |
| 7           | -2,830100758     | 1,970063855   | 240            | 19,73152315 | GO:0009167 | purine ribonucleoside monophosphate metabolic process       |
| 8           | -2,759711073     | 1,817583128   | 264            | 19,59653064 | GO:0009141 | nucleoside triphosphate metabolic process                   |
| 9           | -6,312429381     | 2,739893154   | 325            | 19,57057592 | GO:0034470 | ncRNA processing                                            |
| 10          | -9,43358458      | 5,821166728   | 71             | 19,28701229 | GO:0033108 | mitochondrial respiratory chain complex assembly            |
| 11          | -14,66732433     | 3,731780367   | 59             | 18,21492109 | GO:0042255 | ribosome assembly                                           |
| 12          | -0,439738361     | 1,821001383   | 405            | 17,50554233 | GO:0019693 | ribose phosphate metabolic process                          |
| 13          | -5,209594407     | 2,766344395   | 434            | 17,17784408 | GO:0034660 | ncRNA metabolic process                                     |
| 14          | -0,402496441     | 1,799617403   | 379            | 16,64585246 | GO:0009150 | purine ribonucleotide metabolic process                     |
| 15          | -7,476019302     | 2,411801084   | 88             | 16,37688618 | GO:0006119 | oxidative phosphorylation                                   |
| 16          | -2,123907785     | 2,211354598   | 331            | 16,2448795  | GO:0006091 | generation of precursor metabolites and energy              |
| 17          | -11,89765195     | 7,550355814   | 42             | 15,84704371 | GO:0010257 | NADH dehydrogenase complex assembly                         |
| 18          | -11,89765195     | 7,550355814   | 42             | 15,84704371 | GO:0032981 | mitochondrial respiratory chain complex I assembly          |
| 19          | 0,454274249      | 1,754652412   | 441            | 14,89690327 | GO:0072521 | purine-containing compound metabolic process                |
| 20          | -12,85309382     | 3,563870175   | 67             | 13,93055518 | GO:0042273 | ribosomal large subunit biogenesis                          |
| 21          | -2,415159652     | 2,002044224   | 162            | 13,83499427 | GO:0006839 | mitochondrial transport                                     |
| 22          | -2,732094932     | 1,995266576   | 150            | 13,59540768 | GO:0045333 | cellular respiration                                        |
| 23          | -6,843679077     | 2,495313973   | 218            | 13,57545771 | GO:0071826 | ribonucleoprotein complex subunit organization              |
| 24          | -13,32305488     | 2,114318205   | 70             | 13,20997491 | GO:0002181 | cytoplasmic translation                                     |
| 25          | -5,181882963     | 2,296707418   | 85             | 13,07270365 | GO:0022900 | electron transport chain                                    |
| 26          | -2,835510682     | 1,753927463   | 120            | 12,66939946 | GO:0009206 | purine ribonucleoside triphosphate biosynthetic process     |
| 27          | -7,917587852     | 2,328693551   | 64             | 12,38509326 | GO:1990542 | mitochondrial transmembrane transport                       |
| 28          | -2,713694597     | 1,824793322   | 134            | 12,28066999 | GO:0009142 | nucleoside triphosphate biosynthetic process                |
| 29          | -11,78031611     | 3,058188232   | 59             | 12,16213939 | GO:0042274 | ribosomal small subunit biogenesis                          |
| 30          | -4,934478628     | 2,826831157   | 339            | 11,95785412 | GO:0008380 | RNA splicing                                                |
| 31          | -5,314879933     | 2,207002564   | 79             | 11,89542481 | GO:0022904 | respiratory electron transport chain                        |
| 32          | -7,577596827     | 2,967594626   | 57             | 11,83934499 | GO:0042775 | mitochondrial ATP synthesis coupled electron transport      |
| 33          | -6,216865837     | 2,528468599   | 61             | 10,86428809 | GO:0042773 | ATP synthesis coupled electron transport                    |
| 34          | -1,48096719      | 1,878211285   | 143            | 10,6912067  | GO:0009124 | nucleoside monophosphate biosynthetic process               |
| 35          | -9,692948725     | 2,444610153   | 72             | 10,53565869 | GO:0032543 | mitochondrial translation                                   |
| 36          | -0,286294323     | 1,971795612   | 219            | 10,10425553 | GO:0051188 | cofactor biosynthetic process                               |
| 37          | -6,714700412     | 2,434056876   | 87             | 10,05615516 | GO:0070585 | protein localization to mitochondrion                       |
| 38          | -1,690124947     | 2,213472305   | 234            | 9,97706876  | GO:0015980 | energy derivation by oxidation of organic compounds         |
| 39          | -1,338946912     | 1,882806892   | 136            | 9,865538446 | GO:0009156 | ribonucleoside monophosphate biosynthetic process           |
| 40          | -0,075564922     | 1,801643921   | 206            | 9,626324013 | GO:0046390 | ribose phosphate biosynthetic process                       |
| 41          | -23,39923911     | 15,2341023    | 17             | 9,290695868 | GO:0000028 | ribosomal small subunit assembly                            |
| 42          | -4,710800864     | 2,526348571   | 93             | 9,146882185 | GO:0007006 | mitochondrial membrane organization                         |
| 43          | -0,306272897     | 1,773049042   | 191            | 9,103942745 | GO:0009152 | purine ribonucleotide biosynthetic process                  |
| 44          | 0,253763835      | 1,933774476   | 259            | 8,885297226 | GO:1901293 | nucleoside phosphate biosynthetic process                   |
| 45          | 1,410559201      | 1,966195612   | 294            | 8,758465215 | GO:0006732 | coenzyme metabolic process                                  |
| 46          | -13,25732942     | 4,677895976   | 29             | 8,736906789 | GO:0000027 | ribosomal large subunit assembly                            |
| 47          | -1,288033422     | 1,581861122   | 144            | 8,20864267  | GO:0034404 | nucleobase-containing small molecule biosynthetic process   |
| 48          | -13,84709384     | 4,487273791   | 22             | 8,068709316 | GO:0010499 | proteasomal ubiquitin-independent protein catabolic process |

|    |              |             |     |             |            |                                                              |
|----|--------------|-------------|-----|-------------|------------|--------------------------------------------------------------|
| 49 | -0,046392961 | 1,793113159 | 213 | 8,049955544 | GO:0072522 | purine-containing compound biosynthetic process              |
| 50 | -4,146705083 | 1,853883991 | 71  | 7,991335869 | GO:1903578 | regulation of ATP metabolic process                          |
| 51 | -3,719586857 | 2,690913872 | 418 | 7,842991721 | GO:0006397 | mRNA processing                                              |
| 52 | -11,04676475 | 3,420038857 | 38  | 7,089148137 | GO:0044743 | protein transmembrane import into intracellular organelle    |
| 53 | -2,809286165 | 1,902157758 | 88  | 7,03502359  | GO:0006140 | regulation of nucleotide metabolic process                   |
| 54 | -2,758726783 | 2,007194702 | 102 | 6,867145333 | GO:0009132 | nucleoside diphosphate metabolic process                     |
| 55 | 0,069171407  | 2,411172568 | 168 | 6,715083348 | GO:0009108 | coenzyme biosynthetic process                                |
| 56 | -3,770414887 | 2,175301095 | 49  | 6,564865852 | GO:0006749 | glutathione metabolic process                                |
| 57 | -14,62237544 | 4,400734713 | 21  | 6,563028666 | GO:0000469 | cleavage involved in rRNA processing                         |
| 58 | 1,605858422  | 1,876788818 | 151 | 6,437328624 | GO:0006733 | oxidoreduction coenzyme metabolic process                    |
| 59 | -14,07507587 | 2,527924347 | 29  | 6,28519729  | GO:0000387 | spliceosomal snRNP assembly                                  |
| 60 | 8,539547358  | 2,578739923 | 92  | 6,237980106 | GO:0006892 | post-Golgi vesicle-mediated transport                        |
| 61 | -2,126803392 | 2,055543347 | 82  | 6,188636614 | GO:0009179 | purine ribonucleoside diphosphate metabolic process          |
| 62 | -9,204455527 | 2,450373295 | 57  | 6,187691895 | GO:0019080 | viral gene expression                                        |
| 63 | -7,687680724 | 2,63922132  | 54  | 5,915508727 | GO:0071806 | protein transmembrane transport                              |
| 64 | -2,543016739 | 1,92549202  | 86  | 5,903258971 | GO:0046939 | nucleotide phosphorylation                                   |
| 65 | -0,684410231 | 1,88250033  | 420 | 5,893393506 | GO:0019439 | aromatic compound catabolic process                          |
| 66 | -7,832208118 | 2,597962662 | 53  | 5,880350158 | GO:0065002 | intracellular protein transmembrane transport                |
| 67 | -3,317331635 | 1,901156939 | 101 | 5,872573165 | GO:0043467 | regulation of generation of precursor metabolites and energy |
| 68 | -0,34925009  | 1,650533627 | 111 | 5,842196432 | GO:0009166 | nucleotide catabolic process                                 |
| 69 | 8,687369015  | 1,541581713 | 324 | 5,833478674 | GO:0002443 | leukocyte mediated immunity                                  |
| 70 | 8,557687158  | 1,548696134 | 209 | 5,823178711 | GO:0002703 | regulation of leukocyte mediated immunity                    |
| 71 | -0,289983512 | 1,876670333 | 444 | 5,783830981 | GO:1901361 | organic cyclic compound catabolic process                    |
| 72 | -7,019031481 | 2,509630753 | 28  | 5,735283608 | GO:0007007 | inner mitochondrial membrane organization                    |
| 73 | -8,88411311  | 2,819037119 | 40  | 5,719522124 | GO:0030490 | maturation of SSU-rRNA                                       |
| 74 | 0,305568197  | 1,602129707 | 121 | 5,572103707 | GO:1901292 | nucleoside phosphate catabolic process                       |
| 75 | 1,200303199  | 2,017291696 | 250 | 5,457297988 | GO:0006790 | sulfur compound metabolic process                            |
| 76 | -1,781067104 | 2,251161284 | 107 | 5,433773798 | GO:0008637 | apoptotic mitochondrial changes                              |
| 77 | -0,451924174 | 1,844833225 | 406 | 5,405131924 | GO:0046700 | heterocycle catabolic process                                |
| 78 | -1,253826397 | 1,909264125 | 366 | 5,281668752 | GO:0034655 | nucleobase-containing compound catabolic process             |
| 79 | 2,76299229   | 1,865034777 | 447 | 5,27811487  | GO:0090407 | organophosphate biosynthetic process                         |
| 80 | -1,376648283 | 1,994539335 | 49  | 5,264997478 | GO:0010823 | negative regulation of mitochondrion organization            |
| 81 | 5,941479365  | 1,543124832 | 44  | 5,236550366 | GO:0033003 | regulation of mast cell activation                           |
| 82 | -0,712653574 | 1,867261937 | 400 | 5,222766244 | GO:0044270 | cellular nitrogen compound catabolic process                 |
| 83 | -6,265529266 | 1,455255506 | 33  | 5,219009504 | GO:0006220 | pyrimidine nucleotide metabolic process                      |
| 84 | -8,988151025 | 1,641552801 | 20  | 5,177998338 | GO:0006783 | heme biosynthetic process                                    |
| 85 | 1,805363945  | 1,761296412 | 133 | 5,0397885   | GO:0046496 | nicotinamide nucleotide metabolic process                    |
| 86 | -3,301193196 | 2,682747698 | 140 | 4,993219539 | GO:0006457 | protein folding                                              |
| 87 | -2,33541661  | 2,549746425 | 186 | 4,99120789  | GO:0071824 | protein-DNA complex subunit organization                     |
| 88 | -1,310103139 | 2,801145102 | 255 | 4,988485368 | GO:0006520 | cellular amino acid metabolic process                        |
| 89 | 6,936616141  | 2,289244917 | 253 | 4,777825915 | GO:0048193 | Golgi vesicle transport                                      |
| 90 | -3,800105122 | 1,910565012 | 57  | 4,749428434 | GO:0001836 | release of cytochrome c from mitochondria                    |
| 91 | -3,943644336 | 2,960354094 | 161 | 4,717257798 | GO:0006399 | tRNA metabolic process                                       |
| 92 | 1,74874613   | 1,83043019  | 139 | 4,715616291 | GO:0072524 | pyridine-containing compound metabolic process               |
| 93 | -12,51886674 | 4,826315354 | 14  | 4,562034346 | GO:0034471 | ncRNA 5'-end processing                                      |
| 94 | 4,954730573  | 2,028978403 | 201 | 4,542500809 | GO:0006898 | receptor-mediated endocytosis                                |
| 95 | 7,774945946  | 1,688319154 | 245 | 4,524395357 | GO:0051056 | regulation of small GTPase mediated signal transduction      |
| 96 | 7,907722054  | 2,301889923 | 121 | 4,475515048 | GO:0007030 | Golgi organization                                           |
| 97 | -5,070974728 | 2,210465088 | 28  | 4,436480149 | GO:0017004 | cytochrome complex assembly                                  |

|     |              |             |     |             |            |                                                                                                                           |
|-----|--------------|-------------|-----|-------------|------------|---------------------------------------------------------------------------------------------------------------------------|
| 98  | -8,777325978 | 1,776001576 | 25  | 4,424995849 | GO:0006221 | pyrimidine nucleotide biosynthetic process                                                                                |
| 99  | -25,42877966 | 2,808889574 | 14  | 4,297029595 | GO:0019081 | viral translation                                                                                                         |
| 100 | 0,927358588  | 1,767420575 | 124 | 4,270757493 | GO:0010821 | regulation of mitochondrion organization                                                                                  |
| 101 | -7,144431758 | 5,232360016 | 19  | 4,266951477 | GO:0031163 | metallo-sulfur cluster assembly                                                                                           |
| 102 | -7,144431758 | 5,232360016 | 19  | 4,266951477 | GO:0016226 | iron-sulfur cluster assembly                                                                                              |
| 103 | 1,630021773  | 2,424085268 | 295 | 4,262406934 | GO:0044282 | small molecule catabolic process                                                                                          |
| 104 | -0,653877666 | 1,374919433 | 39  | 4,252946487 | GO:0098754 | detoxification                                                                                                            |
| 105 | 1,946485543  | 1,847179953 | 266 | 4,245836838 | GO:0051604 | protein maturation                                                                                                        |
| 106 | -1,147344261 | 2,064501448 | 73  | 4,224562456 | GO:0042866 | pyruvate biosynthetic process                                                                                             |
| 107 | 16,3740074   | 0,895160214 | 62  | 4,183788144 | GO:0045576 | mast cell activation                                                                                                      |
| 108 | -27,32983112 | 4,763714204 | 10  | 4,1787537   | GO:0075522 | IRES-dependent viral translational initiation                                                                             |
| 109 | 7,592788244  | 1,52618859  | 146 | 4,14151797  | GO:0002705 | positive regulation of leukocyte mediated immunity                                                                        |
| 110 | -7,201758793 | 1,763904418 | 29  | 4,1272343   | GO:0042168 | heme metabolic process                                                                                                    |
| 111 | 6,11384644   | 1,690822981 | 461 | 4,056883896 | GO:0007264 | small GTPase mediated signal transduction                                                                                 |
| 112 | -3,885750298 | 2,894476929 | 111 | 4,029334911 | GO:0008033 | tRNA processing                                                                                                           |
| 113 | -0,916291042 | 2,564762874 | 188 | 4,011924104 | GO:1901605 | alpha-amino acid metabolic process                                                                                        |
| 114 | -11,48564651 | 4,634703381 | 13  | 4,004644491 | GO:0099116 | tRNA 5'-end processing                                                                                                    |
| 115 | 6,35397828   | 2,008139781 | 110 | 3,993600061 | GO:0031623 | receptor internalization                                                                                                  |
| 116 | 18,30849279  | 2,325802547 | 23  | 3,983622832 | GO:0046856 | phosphatidylinositol dephosphorylation                                                                                    |
| 117 | 0,409616087  | 2,138220819 | 83  | 3,955582758 | GO:0019359 | nicotinamide nucleotide biosynthetic process                                                                              |
| 118 | -11,92236767 | 1,607004696 | 16  | 3,953195689 | GO:0009147 | pyrimidine nucleoside triphosphate metabolic process                                                                      |
| 119 | 6,541932054  | 2,300034417 | 194 | 3,952153106 | GO:0034329 | cell junction assembly                                                                                                    |
| 120 | 1,13444558   | 1,57797249  | 86  | 3,935673218 | GO:1902600 | proton transmembrane transport                                                                                            |
| 121 | -1,630946946 | 2,440100095 | 151 | 3,919488533 | GO:0065004 | protein-DNA complex assembly                                                                                              |
| 122 | -7,363470484 | 1,792147594 | 26  | 3,862933011 | GO:0019692 | deoxyribose phosphate metabolic process                                                                                   |
| 123 | -7,363470484 | 1,792147594 | 26  | 3,862933011 | GO:0009394 | 2'-deoxyribonucleotide metabolic process                                                                                  |
| 124 | 0,539479185  | 2,162837112 | 96  | 3,85537035  | GO:0006090 | pyruvate metabolic process                                                                                                |
| 125 | -3,013205988 | 2,290250721 | 297 | 3,854422427 | GO:0006417 | regulation of translation                                                                                                 |
| 126 | 2,88546761   | 2,109874444 | 383 | 3,838573741 | GO:0001667 | ameboidal-type cell migration                                                                                             |
| 127 | 5,084787941  | 1,773076612 | 54  | 3,819951919 | GO:0002886 | regulation of myeloid leukocyte mediated immunity                                                                         |
| 128 | -4,789710219 | 1,520603806 | 14  | 3,803053982 | GO:0009084 | glutamine family amino acid biosynthetic process                                                                          |
| 129 | -8,838391964 | 2,169051773 | 44  | 3,799889155 | GO:0006414 | translational elongation                                                                                                  |
| 130 | -5,440623233 | 2,354146711 | 20  | 3,778571351 | GO:0033599 | regulation of mammary gland epithelial cell proliferation                                                                 |
| 131 | -10,46084884 | 4,956367666 | 11  | 3,735337973 | GO:0001682 | tRNA 5'-leader removal                                                                                                    |
| 132 | -19,85598108 | 5,377012331 | 9   | 3,71942001  | GO:0006183 | GTP biosynthetic process                                                                                                  |
| 133 | 6,584045204  | 1,679868048 | 265 | 3,715112706 | GO:0002460 | adaptive immune response based on somatic recombination of immune receptors built from immunoglobulin superfamily domains |
| 134 | 8,047485154  | 1,600055977 | 214 | 3,6485723   | GO:0046578 | regulation of Ras protein signal transduction                                                                             |
| 135 | -2,427348401 | 1,954349761 | 111 | 3,638537991 | GO:1902806 | regulation of cell cycle G1/S phase transition                                                                            |
| 136 | 8,255306412  | 2,038226443 | 101 | 3,63106406  | GO:0006939 | smooth muscle contraction                                                                                                 |
| 137 | 0,888898165  | 1,888108444 | 352 | 3,623388737 | GO:0072594 | establishment of protein localization to organelle                                                                        |
| 138 | -1,633181713 | 2,472229601 | 50  | 3,614848789 | GO:0046902 | regulation of mitochondrial membrane permeability                                                                         |
| 139 | 6,922775109  | 1,739953407 | 117 | 3,607021324 | GO:0016999 | antibiotic metabolic process                                                                                              |
| 140 | 1,759167634  | 2,099331914 | 39  | 3,598003651 | GO:0045910 | negative regulation of DNA recombination                                                                                  |
| 141 | 17,86872557  | 1,816409152 | 21  | 3,59376383  | GO:0031649 | heat generation                                                                                                           |
| 142 | 0,415791604  | 2,273023129 | 90  | 3,590995057 | GO:0072525 | pyridine-containing compound biosynthetic process                                                                         |
| 143 | 12,20277565  | 4,113294296 | 11  | 3,561145166 | GO:0045717 | negative regulation of fatty acid biosynthetic process                                                                    |
| 144 | 1,101046707  | 1,987853334 | 327 | 3,560147845 | GO:0016053 | organic acid biosynthetic process                                                                                         |
| 145 | 2,679765799  | 2,323443548 | 100 | 3,544350181 | GO:0048259 | regulation of receptor-mediated endocytosis                                                                               |
| 146 | 10,25615759  | 1,659667402 | 24  | 3,544191042 | GO:0045332 | phospholipid translocation                                                                                                |

|     |              |             |     |             |            |                                                                   |
|-----|--------------|-------------|-----|-------------|------------|-------------------------------------------------------------------|
| 147 | -4,165342528 | 13,59221876 | 16  | 3,537324512 | GO:1901663 | quinone biosynthetic process                                      |
| 148 | 8,938834393  | 1,797546155 | 51  | 3,506245711 | GO:0050775 | positive regulation of dendrite morphogenesis                     |
| 149 | 1,320859112  | 2,308888817 | 32  | 3,491851649 | GO:1903146 | regulation of autophagy of mitochondrion                          |
| 150 | -13,32158727 | 2,971659764 | 14  | 3,474795353 | GO:0090151 | establishment of protein localization to mitochondrial membrane   |
| 151 | 2,914731584  | 2,469414529 | 125 | 3,448814827 | GO:0048675 | axon extension                                                    |
| 152 | -0,500630355 | 2,088452898 | 358 | 3,423215176 | GO:0043161 | proteasome-mediated ubiquitin-dependent protein catabolic process |
| 153 | -0,537246272 | 2,197726783 | 420 | 3,411719817 | GO:0010498 | proteasomal protein catabolic process                             |
| 154 | 1,16577292   | 1,995160174 | 326 | 3,383801266 | GO:0046394 | carboxylic acid biosynthetic process                              |
| 155 | 2,098214043  | 2,30878553  | 44  | 3,381835257 | GO:0030517 | negative regulation of axon extension                             |
| 156 | -3,12425483  | 3,135588625 | 130 | 3,368026107 | GO:0009451 | RNA modification                                                  |
| 157 | -12,40323498 | 2,972901229 | 17  | 3,36657825  | GO:1904666 | regulation of ubiquitin protein ligase activity                   |
| 158 | 2,519139663  | 2,268994364 | 237 | 3,359152674 | GO:0048588 | developmental cell growth                                         |
| 159 | 4,311689248  | 1,992012679 | 215 | 3,35433649  | GO:0017157 | regulation of exocytosis                                          |
| 160 | -3,074927604 | 2,186704389 | 116 | 3,350302102 | GO:0006338 | chromatin remodeling                                              |
| 161 | 6,039285999  | 1,912061607 | 183 | 3,346609103 | GO:0043112 | receptor metabolic process                                        |
| 162 | 1,996693149  | 2,489167827 | 207 | 3,336040229 | GO:0046395 | carboxylic acid catabolic process                                 |
| 163 | -11,5592829  | 3,134536067 | 21  | 3,327328464 | GO:0000470 | maturation of LSU-rRNA                                            |
| 164 | -0,193405586 | 2,065377476 | 269 | 3,32466041  | GO:0009895 | negative regulation of catabolic process                          |
| 165 | 6,343560049  | 2,481274192 | 81  | 3,320474115 | GO:0008589 | regulation of smoothed signaling pathway                          |
| 166 | -1,639016735 | 2,213260936 | 404 | 3,318762913 | GO:0010608 | posttranscriptional regulation of gene expression                 |
| 167 | 5,407526806  | 3,184027846 | 34  | 3,317069009 | GO:0045601 | regulation of endothelial cell differentiation                    |
| 168 | -1,325364827 | 1,99284757  | 143 | 3,308399067 | GO:2000058 | regulation of ubiquitin-dependent protein catabolic process       |
| 169 | 0,681794703  | 1,394209883 | 44  | 3,3052335   | GO:0042743 | hydrogen peroxide metabolic process                               |
| 170 | -0,868932503 | 2,022629988 | 63  | 3,292403158 | GO:0006081 | cellular aldehyde metabolic process                               |
| 171 | -8,005346418 | 3,451169125 | 27  | 3,285959096 | GO:0000460 | maturation of 5.8S rRNA                                           |
| 172 | -0,479809345 | 2,163356506 | 117 | 3,269760867 | GO:0016052 | carbohydrate catabolic process                                    |
| 173 | -15,70392122 | 2,733751478 | 12  | 3,246538633 | GO:1901070 | guanosine-containing compound biosynthetic process                |
| 174 | -13,92004564 | 2,909718264 | 14  | 3,235914409 | GO:0043248 | proteasome assembly                                               |
| 175 | 5,196418144  | 2,992118686 | 84  | 3,228534975 | GO:0007041 | lysosomal transport                                               |
| 176 | -1,323347958 | 2,12261432  | 330 | 3,216305348 | GO:0045787 | positive regulation of cell cycle                                 |
| 177 | -1,333538668 | 2,149316464 | 236 | 3,206971459 | GO:0051348 | negative regulation of transferase activity                       |
| 178 | 9,511273383  | 1,276123832 | 183 | 3,202545421 | GO:0002274 | myeloid leukocyte activation                                      |
| 179 | 7,039068999  | 1,789988006 | 240 | 3,195740577 | GO:0034330 | cell junction organization                                        |
| 180 | 1,133348473  | 3,013719523 | 84  | 3,194842501 | GO:1903008 | organelle disassembly                                             |
| 181 | -4,997421388 | 1,943206247 | 12  | 3,189806926 | GO:0051198 | negative regulation of coenzyme metabolic process                 |
| 182 | -4,997421388 | 1,943206247 | 12  | 3,189806926 | GO:0030812 | negative regulation of nucleotide catabolic process               |
| 183 | -11,0810523  | 4,719026131 | 11  | 3,187662578 | GO:0000491 | small nucleolar ribonucleoprotein complex assembly                |
| 184 | 4,949655709  | 1,857773942 | 42  | 3,178429605 | GO:0043300 | regulation of leukocyte degranulation                             |
| 185 | -6,69522083  | 1,469836291 | 26  | 3,161856979 | GO:0033014 | tetrapyrrole biosynthetic process                                 |
| 186 | 0,348106538  | 2,01632182  | 63  | 3,14222077  | GO:0009064 | glutamine family amino acid metabolic process                     |
| 187 | -6,636726973 | 1,637530445 | 30  | 3,126621612 | GO:1901659 | glycosyl compound biosynthetic process                            |
| 188 | 5,158555739  | 1,772234248 | 86  | 3,120995012 | GO:0042310 | vasoconstriction                                                  |
| 189 | 13,38590031  | 1,137844586 | 62  | 3,116106428 | GO:0043299 | leukocyte degranulation                                           |
| 190 | -4,188908209 | 2,351036496 | 108 | 3,114191295 | GO:0045727 | positive regulation of translation                                |
| 191 | -11,08823807 | 1,695255511 | 11  | 3,111876158 | GO:0009264 | deoxyribonucleotide catabolic process                             |
| 192 | 2,302420009  | 2,273641846 | 99  | 3,090484245 | GO:0030048 | actin filament-based movement                                     |
| 193 | 11,70509754  | 1,204412182 | 86  | 3,090337704 | GO:0002444 | myeloid leukocyte mediated immunity                               |
| 194 | -13,48348469 | 4,42910334  | 9   | 3,090228012 | GO:0000492 | box C/D snoRNP assembly                                           |
| 195 | 5,191920341  | 1,791746234 | 345 | 3,082772354 | GO:0006887 | exocytosis                                                        |

|     |              |             |     |             |            |                                                                      |
|-----|--------------|-------------|-----|-------------|------------|----------------------------------------------------------------------|
| 196 | -5,139258205 | 2,438001376 | 35  | 3,0601216   | GO:0018208 | peptidyl-proline modification                                        |
| 197 | -1,299224982 | 1,724515588 | 36  | 3,0546995   | GO:0030811 | regulation of nucleotide catabolic process                           |
| 198 | -5,454033334 | 2,356464226 | 18  | 3,046315637 | GO:0008535 | respiratory chain complex IV assembly                                |
| 199 | -8,539424799 | 3,362765544 | 24  | 3,037901282 | GO:0070199 | establishment of protein localization to chromosome                  |
| 200 | -4,03539373  | 1,776539162 | 19  | 3,032533996 | GO:0071157 | negative regulation of cell cycle arrest                             |
| 201 | -2,209576272 | 2,329947721 | 340 | 3,030303034 | GO:0034248 | regulation of cellular amide metabolic process                       |
| 202 | 7,740649391  | 2,137732248 | 90  | 3,02750703  | GO:0099072 | regulation of postsynaptic membrane neurotransmitter receptor levels |
| 203 | 4,433648163  | 0,951222956 | 10  | 3,006279702 | GO:0043497 | regulation of protein heterodimerization activity                    |
| 204 | 0,148593065  | 1,724784925 | 61  | 2,989882812 | GO:0051193 | regulation of cofactor metabolic process                             |
| 205 | -4,629960713 | 2,175260907 | 47  | 2,988233439 | GO:2000059 | negative regulation of ubiquitin-dependent protein catabolic process |
| 206 | 9,984293659  | 3,202488122 | 22  | 2,972607647 | GO:0072337 | modified amino acid transport                                        |
| 207 | -2,865956886 | 2,872992579 | 39  | 2,946892312 | GO:0006284 | base-excision repair                                                 |
| 208 | -0,063853656 | 2,022893454 | 224 | 2,944501511 | GO:0031330 | negative regulation of cellular catabolic process                    |
| 209 | -11,28273578 | 1,783776245 | 13  | 2,944327116 | GO:0009148 | pyrimidine nucleoside triphosphate biosynthetic process              |
| 210 | -6,512016056 | 2,166206506 | 56  | 2,937125954 | GO:0090501 | RNA phosphodiester bond hydrolysis                                   |
| 211 | -12,16407489 | 1,543234839 | 10  | 2,935087443 | GO:0046386 | deoxyribose phosphate catabolic process                              |
| 212 | 3,151412859  | 2,076689381 | 267 | 2,91753147  | GO:0090130 | tissue migration                                                     |
| 213 | 7,111709487  | 1,320436724 | 358 | 2,906835    | GO:0002697 | regulation of immune effector process                                |
| 214 | -0,002894428 | 1,814428786 | 373 | 2,906619519 | GO:0044419 | interspecies interaction between organisms                           |
| 215 | -7,634943472 | 1,4165714   | 26  | 2,903269554 | GO:0042455 | ribonucleoside biosynthetic process                                  |
| 216 | -2,326368366 | 2,678463966 | 126 | 2,898801824 | GO:0006333 | chromatin assembly or disassembly                                    |
| 217 | -10,42917711 | 2,412062883 | 16  | 2,892580143 | GO:0000966 | RNA 5'-end processing                                                |
| 218 | -0,34550704  | 4,712272452 | 13  | 2,891753479 | GO:0009226 | nucleotide-sugar biosynthetic process                                |
| 219 | -4,118253101 | 2,254110231 | 104 | 2,871015794 | GO:0006413 | translational initiation                                             |
| 220 | 8,19516429   | 2,559795861 | 56  | 2,869234975 | GO:0006893 | Golgi to plasma membrane transport                                   |
| 221 | 3,322908185  | 2,894424069 | 56  | 2,861646428 | GO:0031122 | cytoplasmic microtubule organization                                 |
| 222 | 4,687656883  | 1,77274868  | 120 | 2,847109192 | GO:0035637 | multicellular organismal signaling                                   |
| 223 | -3,314195988 | 2,657043985 | 36  | 2,846375731 | GO:0045684 | positive regulation of epidermis development                         |
| 224 | 11,41775656  | 1,156080229 | 63  | 2,844798306 | GO:0051057 | positive regulation of small GTPase mediated signal transduction     |
| 225 | 3,172352325  | 2,064879129 | 265 | 2,837858136 | GO:0010631 | epithelial cell migration                                            |
| 226 | -2,321617678 | 2,144357376 | 82  | 2,830162722 | GO:0051289 | protein homotetramerization                                          |
| 227 | -5,133354106 | 2,085443883 | 12  | 2,828858361 | GO:0019646 | aerobic electron transport chain                                     |
| 228 | 6,964359597  | 1,261875882 | 225 | 2,826711917 | GO:0002263 | cell activation involved in immune response                          |
| 229 | 2,21900487   | 2,265165308 | 408 | 2,826602174 | GO:0007409 | axonogenesis                                                         |
| 230 | 0,687558359  | 2,77859933  | 62  | 2,82030527  | GO:0061726 | mitochondrion disassembly                                            |
| 231 | -8,605145238 | 3,591473514 | 10  | 2,816597778 | GO:0072321 | chaperone-mediated protein transport                                 |
| 232 | -12,25577937 | 1,681497375 | 14  | 2,805937065 | GO:0046132 | pyrimidine ribonucleoside biosynthetic process                       |
| 233 | -3,922002074 | 3,818923056 | 15  | 2,799609398 | GO:0042407 | cristae formation                                                    |
| 234 | 14,46880453  | 1,231116877 | 11  | 2,787081903 | GO:0033004 | negative regulation of mast cell activation                          |
| 235 | -1,807658035 | 3,023683205 | 72  | 2,784534498 | GO:2000573 | positive regulation of DNA biosynthetic process                      |
| 236 | 2,336024105  | 2,205803746 | 92  | 2,763928196 | GO:0043648 | dicarboxylic acid metabolic process                                  |
| 237 | 2,9213822    | 2,064893471 | 78  | 2,762791875 | GO:0070252 | actin-mediated cell contraction                                      |
| 238 | 11,41005917  | 1,982088816 | 45  | 2,760785342 | GO:0019369 | arachidonic acid metabolic process                                   |
| 239 | 4,966456574  | 1,710653734 | 426 | 2,75308403  | GO:0055074 | calcium ion homeostasis                                              |
| 240 | -1,175644855 | 2,447029354 | 59  | 2,751920064 | GO:0090559 | regulation of membrane permeability                                  |
| 241 | -2,927390184 | 2,216541743 | 57  | 2,746764103 | GO:1901607 | alpha-amino acid biosynthetic process                                |
| 242 | 0,049401391  | 1,181977642 | 50  | 2,746727875 | GO:0072527 | pyrimidine-containing compound metabolic process                     |
| 243 | -2,382718209 | 2,657899675 | 12  | 2,742094395 | GO:0060433 | bronchus development                                                 |
| 244 | 4,012871171  | 1,978770788 | 176 | 2,741430837 | GO:0048771 | tissue remodeling                                                    |

|     |              |             |     |             |            |                                                            |
|-----|--------------|-------------|-----|-------------|------------|------------------------------------------------------------|
| 245 | -3,370236321 | 2,067186022 | 56  | 2,738968106 | GO:0071156 | regulation of cell cycle arrest                            |
| 246 | 10,48503879  | 1,424179323 | 41  | 2,73057951  | GO:0001961 | positive regulation of cytokine-mediated signaling pathway |
| 247 | 4,028165959  | 2,305725565 | 233 | 2,711533614 | GO:0099003 | vesicle-mediated transport in synapse                      |
| 248 | 3,637568311  | 2,009685264 | 151 | 2,709570598 | GO:0035150 | regulation of tube size                                    |
| 249 | 3,179346865  | 2,482613207 | 53  | 2,700348322 | GO:0098661 | inorganic anion transmembrane transport                    |
| 250 | 5,581409642  | 2,295396497 | 30  | 2,688960098 | GO:0098884 | postsynaptic neurotransmitter receptor internalization     |
